# Supplementary material for: Hydrodeoxygenation–Isomerization of Methyl Palmitate over SAPO-11-Supported Ni-Phosphide Catalysts
Source: MDPI journal article supplement (doi:10.3390/catal12111486), 2022-11-21
Supplement: s1 [file s1]

# Hydrodeoxygenation–Isomerization of Methyl Palmitate over SAPO-11-Supported Ni-Phosphide Catalysts

Ivan V. Shamanaev <sup>\*</sup>, Irina A. Shamanaeva, Ekaterina V. Parkhomchuk and Galina A. Bukhtiyarova <sup>\*</sup>

Boriskov Institute of Catalysis, Lavrentiev Ave. 5, 630090 Novosibirsk, Russia

<sup>\*</sup> Correspondence: Correspondence: i.v.shamanaev@catalysis.ru (I.V.S.); gab@catalysis.ru (G.A.B.)

**Table S1.** Textural properties of SAPO-11 and NiP\_I/SAPO-11 samples.

|                            | $V_{\text{micro}}, \text{cm}^3/\text{g}$ | $V_{\text{meso}}, \text{cm}^3/\text{g}$ | $S_{\text{micro}}, \text{m}^2/\text{g}$ | $S_{\text{BET}}, \text{m}^2/\text{g}$ |
|----------------------------|------------------------------------------|-----------------------------------------|-----------------------------------------|---------------------------------------|
| SAPO-11                    | 0.064                                    | 0.08                                    | 166                                     | 188                                   |
| NiP_I/SAPO-11 <sup>1</sup> | 0.007                                    | 0.03                                    | 3                                       | 29                                    |
| NiP_I/SAPO-11 <sup>2</sup> | 0                                        | 0.03                                    | 0                                       | 8                                     |

<sup>1</sup> After TPR at 600 °C. <sup>2</sup> After reaction.

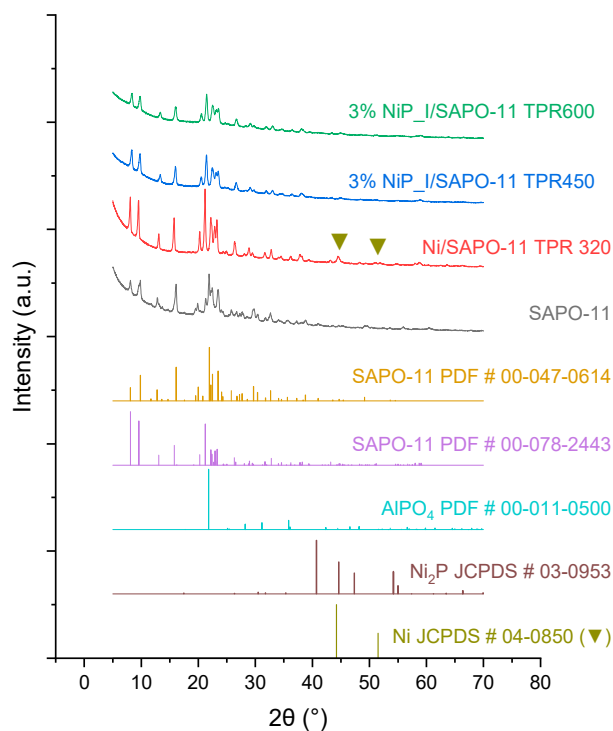

**Figure S1.** XRD patterns of Ni/SAPO-11 and NiP\_I/SAPO-11 samples.

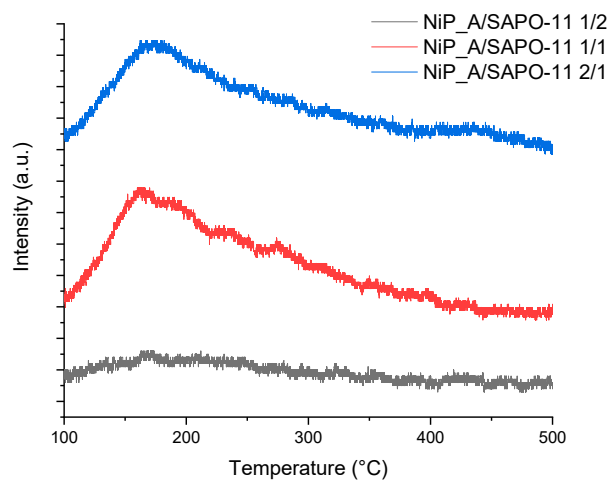

**Figure S2.** NH<sub>3</sub>-TPD curves of 3% NiP\_A samples.

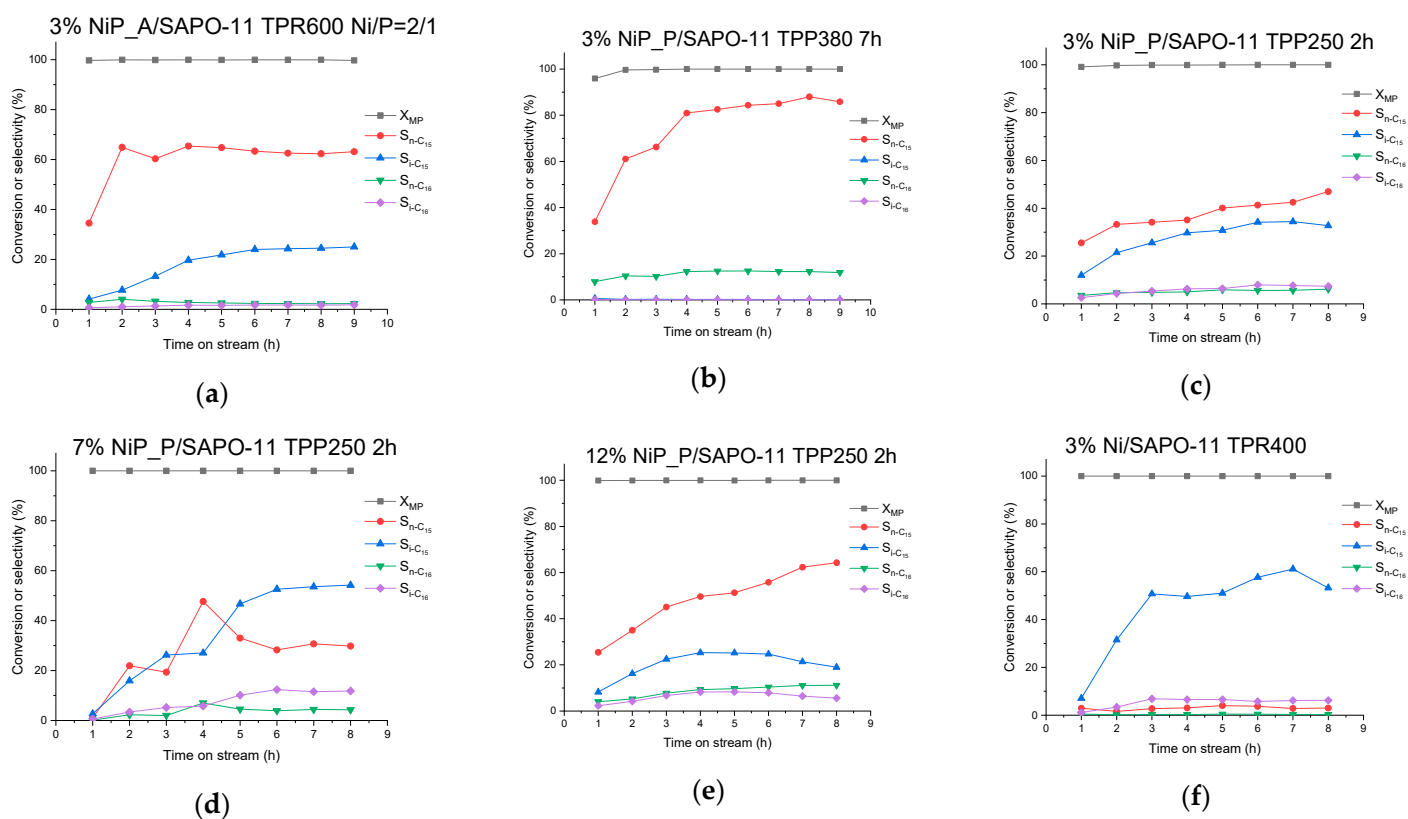

**Figure S3.**  $X_{MP}$  and selectivities of the products vs. time on stream (TOS) over (a) 3% NiP\_A/SAPO-11 TPR 600 Ni/P = 2/1, (b) 3% NiP\_P/SAPO-11 TPP380 7h, (c) 3% NiP\_P/SAPO-11

TPP250 2h, (d) 7% NiP\_P/SAPO-11 TPP250 2h, (e) 12% NiP\_P/SAPO-11 TPP250 2h, and (f) 3% Ni/SAPO-11 TPR400 in a continuous-flow reactor. T = 340 °C (2 MPa, LHSV = 5.3 h<sup>-1</sup>, 600 Ncm<sup>3</sup>/cm<sup>3</sup>).

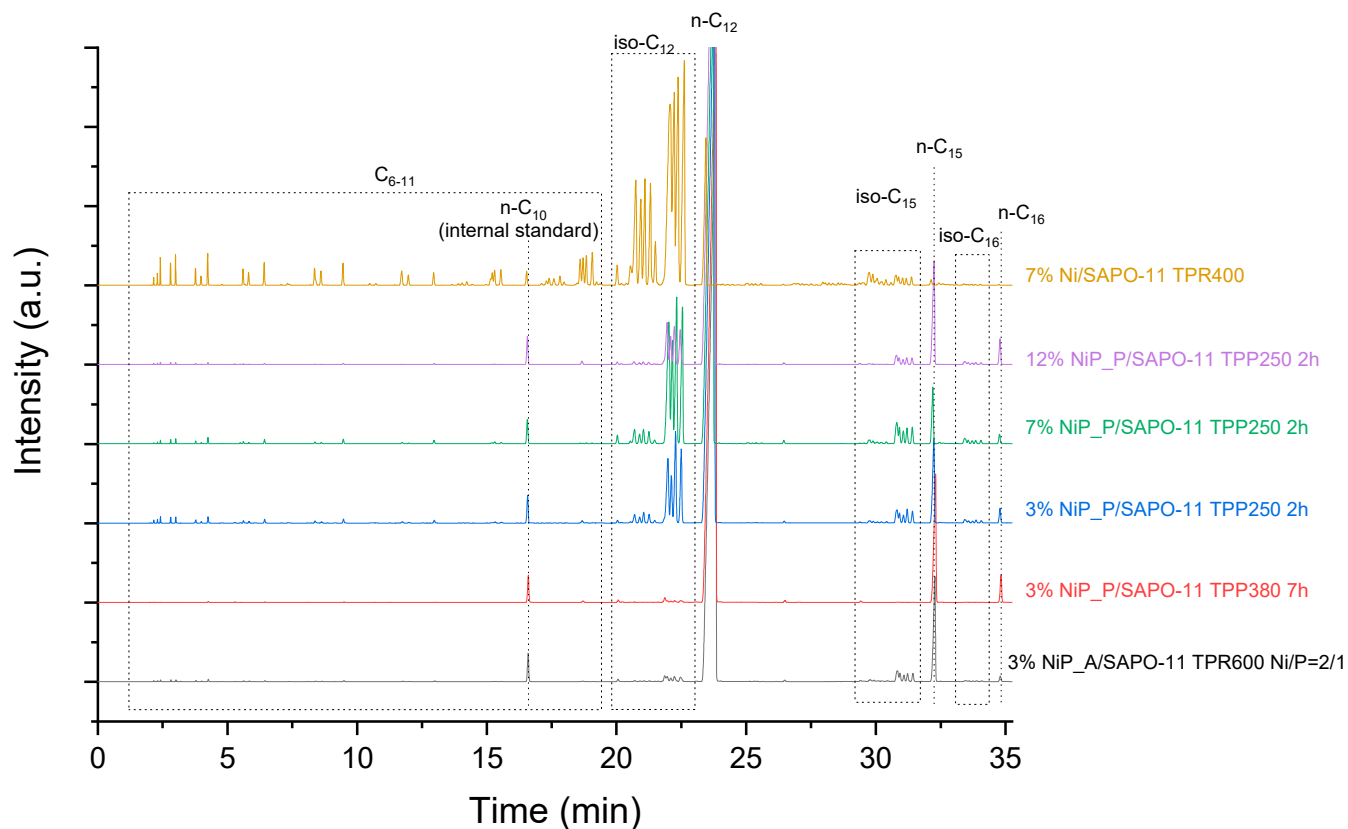

**Figure S4.** Chromatograms of the products after 8 h TOS over Ni phosphide and Ni catalysts on SAPO-11 in continuous-flow reactor ( $X_{MP} = 100\%$ ). T = 340 °C, 2 MPa, LHSV = 5.3 h<sup>-1</sup>, 600 Ncm<sup>3</sup>/cm<sup>3</sup>.

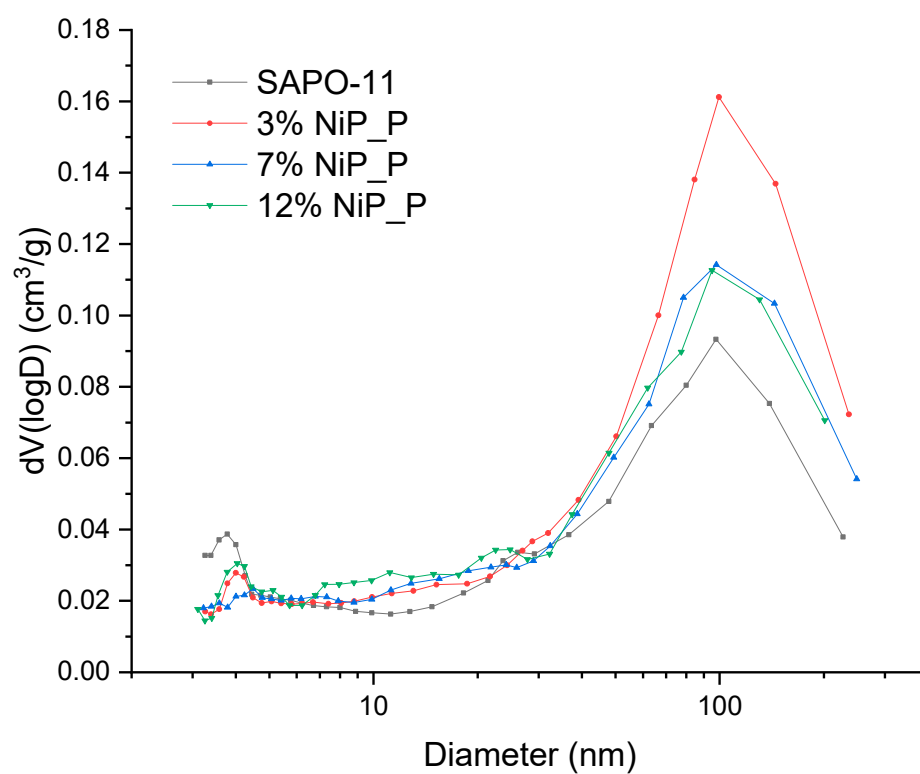

**Figure S5.** Pore size distributions of SAPO-11 and NiP\_P samples.

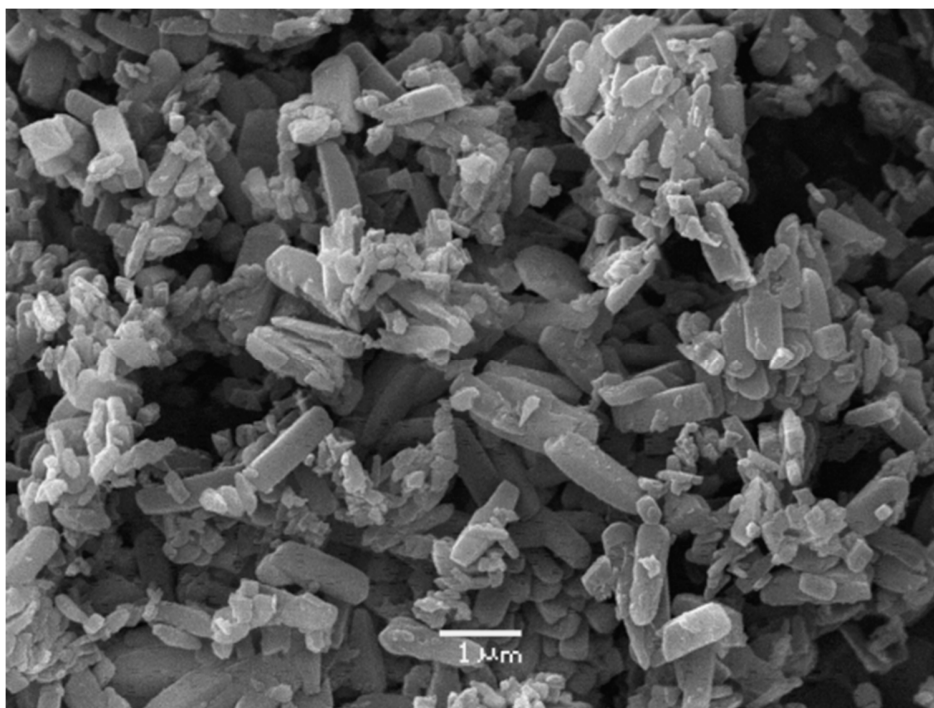

**Figure S6.** SEM image of the SAPO-11 support.
